# Supplementary material for: Sexual Function of Women During Breastfeeding: Exploring Roles, Challenges, and Consequences – A Systematic Review
Source: Research Square preprint supplement (doi:10.21203/rs.3.rs-7894447/v1), 2025-11-25
Supplement: Supplementary file 1 [file 4b1e944b1d36438901827518.docx]

# Supporting Information 3 Quality Appraisal Checklist – Quantitative Studies Sexual Function of Women During Breastfeeding: A Systematic Review

| ID Number (on Excel spreadsheet) |  |
| --- | --- |
| Date form completed |  |
| Assessed by |  |
| Authors |  |
| Title |  |
| Journal |  |
| Year |  |
| Volume |  |
| Issue |  |
| Pages |  |

## POPULATION

| Question | Rating (++, +, -, NR, NA) | Comments |
| --- | --- | --- |
| Is the source population or source area well described? Was the country, setting, location, population demographics etc. adequately described? |  |  |
| Is the eligible population or area representative of the source population or area? Was the recruitment of individuals, clusters or areas well defined? Was the eligible population representative of the source? Were important groups under-represented? |  |  |
| Do the selected participants or areas represent the eligible population or area? Was the method of selection of participants from the eligible population well described? What % of selected individuals or clusters agreed to participate? Were there any sources of bias? Were the inclusion or exclusion criteria explicit and appropriate? |  |  |

## OUTCOMES

| Question | Rating (++, +, -, NR, NA) | Comments |
| --- | --- | --- |
| Were the outcome measures reliable? How reliable were outcome measures (e.g. inter- or intra-rater reliability scores)? Was there any indication that measures had been validated (e.g. validated against a gold standard measure or assessed for content validity)? |  |  |
| Were outcomes relevant? Where surrogate outcome measures were used, did they measure what they set out to measure? |  |  |
| Was follow-up time meaningful? Was follow-up long enough to assess long-term benefits or harms? Was it too long, e.g. participants lost to follow-up? |  |  |

## ANALYSES

| Question | Rating (++, +, -, NR, NA) | Comments |
| --- | --- | --- |
| If applicable, were exposure and comparison groups similar at baseline? If not, were these adjusted? Were there any differences between groups in important confounders at baseline? If so, were these adjusted for in the analyses? Were there likely to be any residual differences of relevance? |  |  |
| Was the study sufficiently powered to detect an intervention effect (if one exists)? Is a power calculation presented? If not, what is the expected effect size? Is the sample size adequate? |  |  |
| Were the estimates of effect size given or calculable? Were effect estimates (e.g. relative risks, absolute risks) given or possible to calculate? |  |  |
| Were the analytical methods appropriate? Were important differences in follow-up time and likely confounders adjusted for? Were subgroup analyses pre-specified? |  |  |
| Was the precision of intervention effects given or calculable? Were they meaningful? Were CI's wide or were they sufficiently precise to aid decision-making? |  |  |

## SUMMARY

| Question | Rating (++, +, -, NR, NA) | Comments |
| --- | --- | --- |
| Are the study results internally valid (i.e. unbiased)? How well did the study minimise sources of bias? Were there significant flaws in the study design? |  |  |
| Are the findings generalisable to the source population (i.e. externally valid)? Are there sufficient details given about the study to determine if the findings are generalisable? |  |  |

## Rating System Explanation

++ Indicates that the study has been designed or conducted to minimise the risk of bias for that aspect.
+ Indicates uncertainty in reporting or incomplete addressing of bias.
− Indicates significant sources of bias for that aspect.
NR Not reported.
NA Not applicable to the study design.

Each study should be awarded an overall study quality grading for internal validity (IV) and external validity (EV):
- ++ All or most checklist criteria fulfilled; conclusions unlikely to change.
- + Some checklist criteria fulfilled; conclusions unlikely to change.
- − Few or no checklist criteria fulfilled; conclusions likely to change.
