# Supplementary material for: Sexual Function of Women During Breastfeeding: Exploring Roles, Challenges, and Consequences – A Systematic Review
Source: Research Square preprint supplement (doi:10.21203/rs.3.rs-7894447/v1), 2025-11-25
Supplement: Supplementary file 2 [file 659aefd6265ee40683f0d597.docx]

# PRISMA 2020 Checklist for Systematic Review

**Title of Manuscript: Sexual Function of Women During Breastfeeding: Exploring Roles, Challenges, and Consequences – A Systematic Review**

Registration: PROSPERO: CRD42025637151

| Item No. | Section/Topic | Checklist Item Description | Location in Manuscript |
| --- | --- | --- | --- |
| 1 | Title | Identify the report as a systematic review. | Page 1 |
| 2 | Abstract | See the PRISMA 2020 for Abstracts checklist. | Page 1 |
| 3 | Rationale | Describe the rationale for the review. | Page 2 |
| 4 | Objectives | Provide an explicit statement of the objective(s) the review addresses. | Page 3 |
| 5 | Eligibility criteria | Specify the inclusion and exclusion criteria for the review and how studies were grouped for the syntheses. | Page 4 |
| 6 | Information sources | Specify all databases, registers, websites, organisations, reference lists and other sources searched or consulted. | Page 4 |
| 7 | Search strategy | Present the full search strategies for all databases, including any filters and limits used. | Pages 4–5 |
| 8 | Selection process | Specify the methods used to decide whether a study met the inclusion criteria of the review. | Page 5 |
| 9 | Data collection process | Specify the methods used to collect data from reports. | Pages 5–6 |
| 10 | Data items | List and define all outcomes and other variables for which data were sought. | Page 6 |
| 11 | Study risk of bias assessment | Specify the methods used to assess risk of bias in the included studies. | Page 5 |
| 12 | Effect measures | Specify for each outcome the effect measure(s) used in the synthesis or presentation of results. | Page 6 |
| 13 | Synthesis methods | Describe the methods of handling and summarizing the data. | Page 6 |
| 14 | Reporting bias assessment | Describe any methods used to assess risk of bias due to missing results in a synthesis. | Page 5 |
| 15 | Certainty assessment | Describe any methods used to assess certainty in the body of evidence. | Not reported |
| 16 | Study selection | Give the number of studies screened, assessed for eligibility, and included in the review. | Page 5 |
| 17 | Study characteristics | Cite each included study and present its characteristics. | Pages 7–8 |
| 18 | Risk of bias in studies | Present assessments of risk of bias for each included study. | Page 5 |
| 19 | Results of individual studies | For all outcomes, present summary data for each group. | Pages 8–12 |
| 20 | Results of syntheses | Present results of all statistical syntheses conducted. | Pages 8–12 |
| 21 | Reporting biases | Present assessments of risk of bias due to missing results. | Page 5 |
| 22 | Certainty of evidence | Present assessments of certainty (or confidence) in the body of evidence. | Not reported |
| 23 | Discussion | Provide a general interpretation of the results in the context of other evidence. | Pages 12–15 |
| 24 | Limitations of evidence | Discuss any limitations of the evidence included in the review. | Page 15 |
| 25 | Limitations of review processes | Discuss limitations of the review processes used. | Page 15 |
| 26 | Implications | Discuss implications of the results for practice, policy, and future research. | Page 15 |
| 27 | Registration and protocol | Provide registration information and where the protocol can be accessed. | Page 6 |
