# Supplementary material for: Sexual Function of Women During Breastfeeding: Exploring Roles, Challenges, and Consequences – A Systematic Review
Source: Research Square preprint supplement (doi:10.21203/rs.3.rs-7894447/v1), 2025-11-25
Supplement: Supplementary file 3 [file ae5e06184f020e2112a939dd.docx]

Search Strategy for Identifying Papers

Title of Systematic Review: Sexual Function of Women During Breastfeeding: Exploring Roles, Challenges, and Consequences – A Systematic Review

# Keywords / MeSH Terms

| Group | Keywords / Terms |
| --- | --- |
| 1. Breastfeeding Terms | "Breastfeeding", "Lactation", "Nursing Mothers", "Postpartum Period", "Lactating Women", "Exclusive Breastfeeding" |
| 2. Sexual Function/Dysfunction | "Sexual Function", "Sexual Dysfunction", "Female Sexual Dysfunction", "Sexual Desire", "Sexual Arousal", "Orgasm", "Lubrication", "Dyspareunia", "Pain during intercourse", "Sexual Satisfaction", "FSFI" |
| 3. Psychosocial/Psychosexual Impacts | "Psychosexual Impact", "Psychological Impact", "Emotional Impact", "Body Image", "Quality of Life", "Relationship Satisfaction", "Self-esteem", "Mental Health", "Psychosocial Outcomes" |

# Search Combinations (Examples)

| # | Search Strategy |
| --- | --- |
| 1 | ("Breastfeeding" OR "Lactation" OR "Nursing Mothers") AND ("Sexual Function" OR "Sexual Dysfunction") |
| 2 | ("Breastfeeding") AND ("Female Sexual Dysfunction" OR "Sexual Desire" OR "Orgasm" OR "Lubrication") |
| 3 | ("Breastfeeding") AND ("Psychosocial Impact" OR "Body Image" OR "Quality of Life") |
| 4 | ("Lactation") AND ("Sexual Satisfaction" OR "Dyspareunia") |
| 5 | ("Postpartum Period") AND ("Sexual Dysfunction" OR "Relationship Satisfaction") |
| 6 | ("Nursing Mothers") AND ("Mental Health" OR "Self-esteem") |
| 7 | ((Group 1 terms) AND (Group 2 terms)) AND (Group 3 terms) – for more specific targeting |

# Databases Searched

- PubMed (MEDLINE)
- Scopus
- Web of Science
- PsycINFO
- CINAHL
