# Supplementary material for: Sexual Function of Women During Breastfeeding: Exploring Roles, Challenges, and Consequences – A Systematic Review
Source: Research Square preprint supplement (doi:10.21203/rs.3.rs-7894447/v1), 2025-11-25
Supplement: Supplementary file 4 [file c0f897492b9404d7ef8233a3.docx]

Data Extraction Form

Title of Systematic Review: Sexual Function of Women During Breastfeeding: Exploring Roles, Challenges, and Consequences – A Systematic Review

# General Information

| ID Number (on Excel spreadsheet) |  |
| --- | --- |
| Date Form Completed |  |
| Authors |  |
| Title of Study |  |
| Journal |  |
| Year |  |
| Volume |  |
| Issue |  |
| Pages |  |
|  |  |

# Study Characteristics

| Participants |  |
| --- | --- |
| Breastfeeding status determined? (☐ YES ☐ NO) |  |
| Stage or duration of breastfeeding |  |
| Marital status reported |  |
| Number of Participants |  |
| Age Range of Participants |  |
| Gender of Participants |  |
| Other Relevant Sociodemographic Data |  |

# Methodological Details

| Study Design |  |
| --- | --- |
| Aim of Study |  |
| Recruitment Method |  |
| Recruitment Setting |  |
| Outcomes Measured |  |
| Tool(s) Used to Measure Sexual Function |  |
| Method(s) of Analysis |  |

# Findings

| Sexual Dysfunction Reported (☐ YES ☐ NO) |  |
| --- | --- |
| → Summary of Findings |  |
| Association Between Breastfeeding and Sexual Function Outcomes (☐ YES ☐ NO) |  |
| → Summary of Association |  |
| Psychosexual Impacts of Breastfeeding (☐ YES ☐ NO) |  |
| → Summary |  |
| Physical, Emotional, Psychological and Social Impacts (☐ YES ☐ NO) |  |
| → Summary |  |
| Other Notes |  |
|  |  |
